# Supplementary material for: Washcoating of cordierite honeycomb with vanadia–tungsta–titania mixed oxides for selective catalytic reduction of NO with NH3
Source: Royal Society of Chemistry journal article supplement (doi:10.1039/c4cy01179a), 2014-11-10
Supplement: c4cy01179a1.pdf [file c4cy01179a1.pdf]

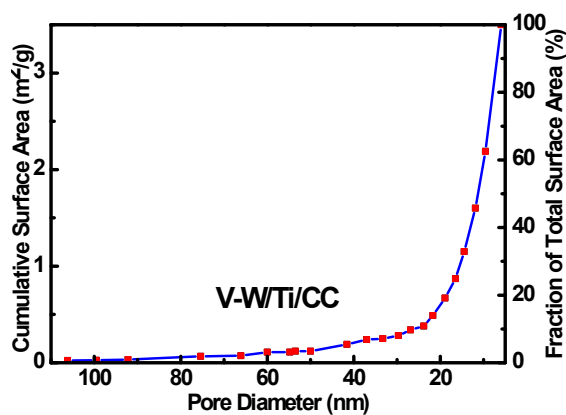

Fig. 1 Results of BJH desorption cumulative surface of area of pores over V-W/Ti/CC catalyst.

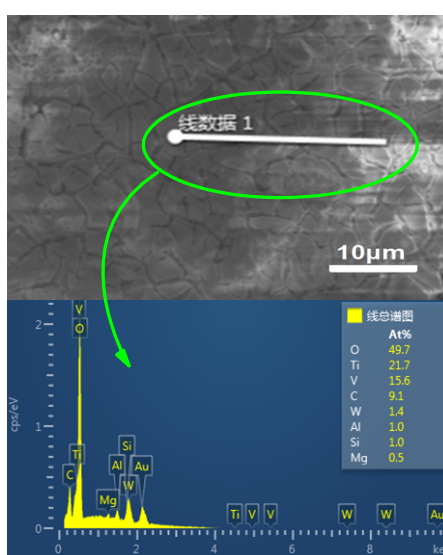

Fig. 2 EDS line scanning test of catalyst surface over sample V-W/Ti/CC

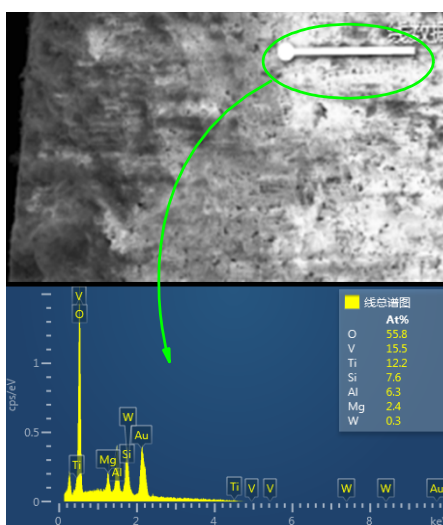

Fig. 3 EDS line scanning test of catalyst cross section over sample V-W/Ti/CC

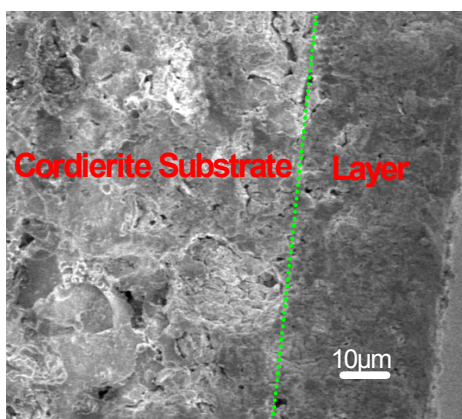

Fig. 4 SEM result of catalyst cross section over sample V-W/Ti/CC

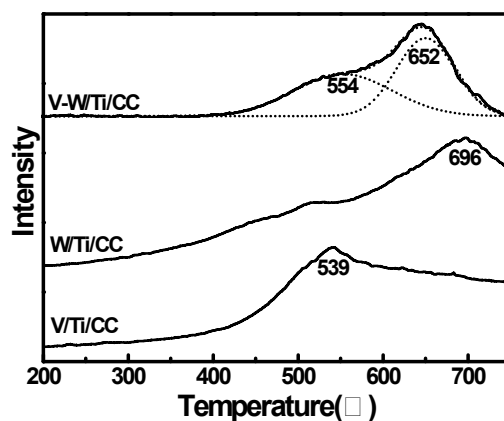

Fig. 5  $H_2$ -TPR analysis of different samples. Testing conditions:  $H_2$ -temperature programmed reduction ( $H_2$ -TPR) experiments are performed in a quartz reactor connected to a thermal conductivity detector (TCD) with  $N_2$ - $H_2$  mixture (10% of  $H_2$  by volume,  $40\text{ ml min}^{-1}$ ) as a reductant. Prior to the reduction, the sample (50 mg) is pretreated in a high purified  $N_2$  stream at  $400\text{ }^\circ\text{C}$  for 1 h and then cooled to room temperature. After that, the TPR starts from room temperature to target temperature at a rate of  $10\text{ }^\circ\text{C min}^{-1}$ .

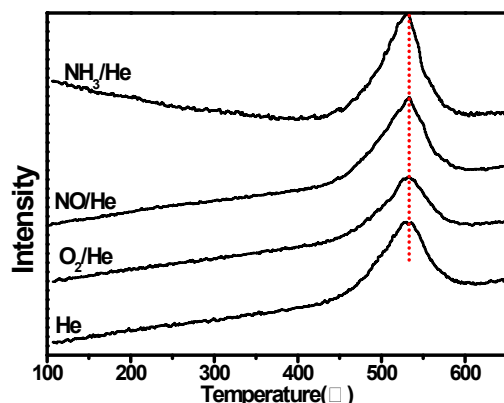

Fig. 6 Results of ( $NO$ ,  $O_2$ ,  $NH_3$ )-TPD over V-W/Ti/CC catalyst in He atmosphere. Testing conditions: 1 g V-W/Ti/CC powder were loaded in the

reactor and pretreated in an high-purity He stream (30 ml/min) at 400°C for 1 h, then cooled to 100°C in the same stream. The pretreated catalysts were then exposed to adsorbed gas respectively, containing NH<sub>3</sub> 10 ml/min +He 30 ml/min or NO 10 ml/min +He 30 ml/min or O<sub>2</sub> 10 ml/min +He 30ml/min or He 30ml/min, at a total flow rate of 40 ml/min. After steady state was reached, the catalysts were purged with high-purity He of 30 ml/min for 1 h, then heated at a rate of 10 °C/min from 100°C up to 700 °C. The effluent were continuously monitored during the whole adsorption/desorption process by thermal conductivity detector.
